# Supplementary material for: Comparative Proteomic Analysis of the Mitochondria-associated ER Membrane (MAM) in a Long-term Type 2 Diabetic Rodent Model
Source: PubMed Central journal article supplement (PMC5437025; doi:10.1038/s41598-017-02213-1), 2017-05-18

## Supplementary information

### Comparative Proteomic analysis of the Mitochondria-associated ER Membrane (MAM) in a Long-term Type 2 Diabetic Rodent Model

Jacey Hongjie Ma<sup>1, 2, 3</sup> ⊗, Shichen Shen<sup>4, 5, 7</sup> ⊗, Joshua J. Wang<sup>1, 2</sup>, Zhanwen He<sup>4, 6</sup>, Amanda Poon<sup>4</sup>, Jun Li<sup>5, 7</sup>, Jun Qu<sup>5, 7</sup> and Sarah X. Zhang<sup>\* 1, 2, 4</sup>

1. Department of Ophthalmology and Ross Eye Institute, University at Buffalo, State University of New York, Buffalo, NY, USA

2. SUNY Eye Institute, State University of New York, NY, USA

3. Aier School of Ophthalmology, Central South University, Changsha, China

4. Department of Biochemistry, University at Buffalo, State University of New York, Buffalo, NY, USA

5. New York State Center of Excellence in Bioinformatics and Life Sciences, 701 Ellicott Street, Buffalo, NY, USA

6. Department of Pediatrics, Sun Yat-Sen Memorial Hospital, Sun Yat-sen University, Guangzhou, China

7. Department of Pharmaceutical Sciences, School of Pharmacy and Pharmaceutical Sciences, University at Buffalo, State University of New York, Buffalo, NY, USA

⊗ Jacey Hongjie Ma and Shichen Shen contributed equally to this study.

#### Corresponding Authors

\* Sarah X. Zhang: Departments of Ophthalmology and Biochemistry, University at Buffalo, The State University of New York, Buffalo, NY 14214, Tel: (716) 645-1808

E-mail: [xzhang38@buffalo.edu](mailto:xzhang38@buffalo.edu)

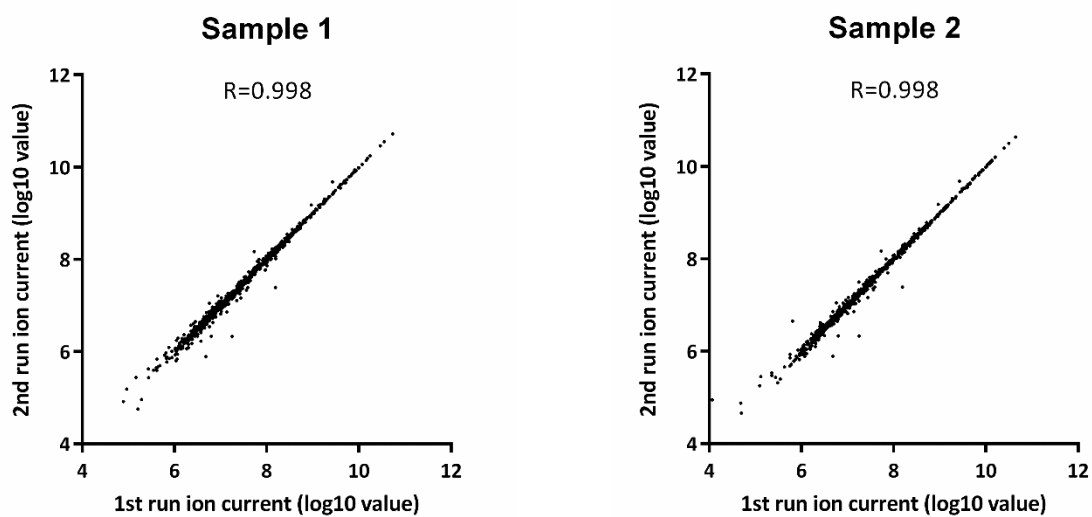

**Supplemental Figure 1. Evaluation of the analytical accuracy and precision for quantification of MAM proteome by duplicating each sample. Representative plots of linear correlations between 2 runs.**

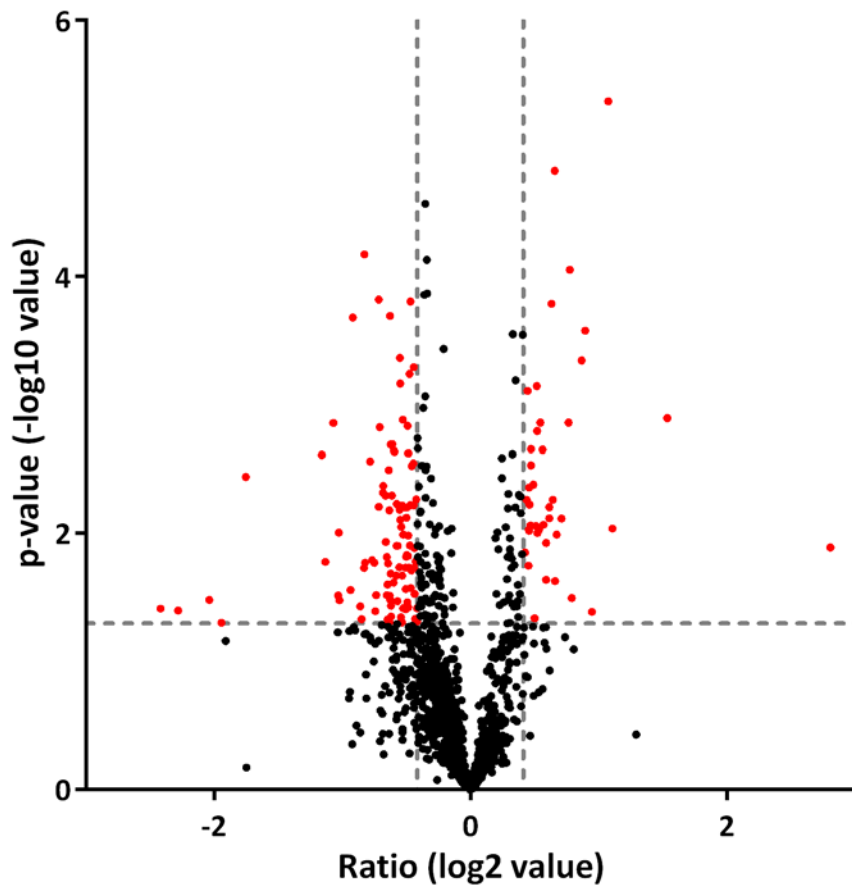

**Supplemental Figure 2. The volcano plot for all proteins quantified.** Grey dotted lines refer to the cutoff thresholds for significantly changed proteins. 144 out of 1,239 proteins were determined to be significantly changed, as denoted in red.

**Table S1. Antibodies applied in immunofluorescence staining (IF) or Western blotting (WB).**

| <b>Antibody</b>       | <b>IF Dilutions</b> | <b>WB Dilutions</b> | <b>Catalog No.</b> | <b>Provider</b>                                        |
|-----------------------|---------------------|---------------------|--------------------|--------------------------------------------------------|
| anti-ATF6             | 1:50                |                     | ab11909            | Abcam                                                  |
| anti-Brna3            | 1:200               |                     | ab5945             | Chemicon                                               |
| anti- $\beta$ -actin  |                     | 1:10000             | ab8226             | Abcam                                                  |
| anti-calnexin         |                     | 1:1000              | A01240             | GenScript                                              |
| anti-calreticulin     | 1:120               | 1:1000              | 2891               | Cell Signaling Technology                              |
| anti-tubulin          |                     | 1:1000              | A01410-40          | GenScript                                              |
| anti-ERP29            | 1:50                | 1:1000              | ab11420            | Abcam                                                  |
| anti-GRP75            | 1:120               | 1:1000              | 3593               | Cell Signaling Technology                              |
| anti-KDEL             |                     | 1:1000              | ab12223            | Abcam                                                  |
| anti-pPERK (Thr 981)  | 1:50                |                     | sc-32577           | Santa Cruz Biotechnology                               |
| anti-XBP1s (Poly6195) | 1:50                |                     | 619502             | BioLegend                                              |
| anti-Cytochrome C     |                     | 1:1000              |                    | Dr. Luke Szweda (Oklahoma Medical Research Foundation) |

**Table S5. MAM proteins involved in the P53 pathway.**

| ID | Protein names | Prediction (based on expression direction)                                     | Ratio (diab/ctrl) | <i>p</i> value |        |
|----|---------------|--------------------------------------------------------------------------------|-------------------|----------------|--------|
| 1  | K1C10_MOUSE   | keratin 10                                                                     | Affected          | 2.19           | 0.0166 |
| 2  | ACBP_MOUSE    | diazepam binding inhibitor (GABA receptor modulator, acyl-CoA binding protein) | Activated         | 2.04           | 0.0098 |
| 3  | PACN1_MOUSE   | Protein kinase C and casein kinase substrate in neurons 1                      | Affected          | 1.54           | 0.0328 |
| 4  | FMO1_MOUSE    | Flavin containing monooxygenase 1                                              | Inhibited         | 1.54           | 0.0366 |
| 5  | ASSY_MOUSE    | Argininosuccinate synthase 1                                                   | Affected          | 1.54           | 0.0446 |
| 6  | PDIA1_MOUSE   | Protein Disulfide Isomerase                                                    | Activated         | 1.52           | 0.0020 |
| 7  | RAP2A_MOUSE   | Ras-Related Protein Rap-2a                                                     | Affected          | 1.47           | 0.0065 |
| 8  | PRIO_MOUSE    | Prion protein                                                                  | Activated         | 1.46           | 0.0078 |
| 9  | CLIC4_MOUSE   | Chloride intracellular channel 4                                               | Activated         | 1.44           | 0.0384 |
| 10 | UBA1_MOUSE    | Ubiquitin-like modifier activating enzyme 1                                    | Inhibited         | 1.40           | 0.0150 |
| 11 | NDRG1_MOUSE   | N-myc downstream regulated 1                                                   | Activated         | 1.40           | 0.0104 |
| 12 | AP1B1_MOUSE   | adaptor-related protein complex 1                                              | Activated         | 1.39           | 0.0006 |
| 13 | TBB3_MOUSE    | Tubulin, beta 3 class III                                                      | Affected          | 0.74           | 0.0054 |
| 14 | TBB4A_MOUSE   | tubulin, beta 4A class IVa                                                     | Affected          | 0.72           | 0.0022 |
| 15 | VAMP4_MOUSE   | Vesicle-associated membrane protein 4                                          | Affected          | 0.71           | 0.0041 |
| 16 | ALBU_MOUSE    | albumin                                                                        | Activated         | 0.66           | 0.0118 |
| 17 | KPCG_MOUSE    | Protein kinase C, gamma                                                        | Inhibited         | 0.65           | 0.0076 |
| 18 | ACLY_MOUSE    | ATP citrate lyase                                                              | Activated         | 0.63           | 0.0000 |
| 19 | PP2AA_MOUSE   | Protein phosphatase 2                                                          | Activated         | 0.61           | 0.0077 |
| 20 | CRYAB_MOUSE   | Crystallin, alpha B                                                            | Inhibited         | 0.58           | 0.0320 |
| 21 | PPT1_MOUSE    | palmitoyl-protein thioesterase 1                                               | Affected          | 0.54           | 0.0003 |

**Table S6. MAM proteins that predict the activation of hypoxia-inducible genes.**

| <b>ID</b> | <b>Protein names</b> | <b>Prediction (based on expression direction)</b> | <b>Ratio (diab/ctrl)</b> | <b><i>p</i> value</b> |
|-----------|----------------------|---------------------------------------------------|--------------------------|-----------------------|
| 1         | ARNT_MOUSE           | Hypoxia-Inducible Factor 1, Beta                  | 1.40                     | N/A                   |
| 2         | GTR3_MOUSE           | Glucose transporter type 3                        | 1.34                     | 0.0384                |
| 3         | MYPR_MOUSE           | Myelin proteolipid protein                        | 1.39                     | 0.0184                |
| 4         | PGK1_MOUSE           | Phosphoglycerate kinase 1                         | 1.45                     | 0.0493                |
| 5         | BAG6_MOUSE           | Large proline-rich protein BAG6                   | 1.44                     | 0.0013                |

**Table S7. Proteins that predict the activation of methyl CpG binding protein 2.**

| <b>ID</b> | <b>Protein names</b> | <b>Prediction (based on expression direction)</b> | <b>Ratio (diab/ctrl)</b> | <b><i>p</i> value</b> |
|-----------|----------------------|---------------------------------------------------|--------------------------|-----------------------|
| 1         | GABR2_MOUSE          | Gamma-aminobutyric acid (GABA) B receptor, 2      | 1.55                     | 0.0306                |
| 2         | MBP_MOUSE            | Myelin basic protein                              | 1.41                     | 0.0152                |
| 3         | DLG4_MOUSE           | Synapse-Associated Protein 90                     | 1.40                     | 0.0024                |
| 4         | MYPR_MOUSE           | proteolipid protein 1                             | 1.39                     | 0.0184                |
| 5         | GTR3_MOUSE           | Glucose transporter type 3                        | 1.34                     | 0.0384                |

# Figure 1B

Protein  
marker

H

Mp

Mc

ER

MAM

C

N

KDEL

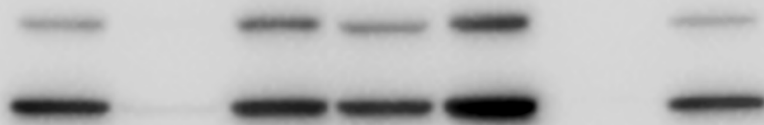

Tubulin

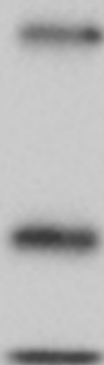

Cyt-c

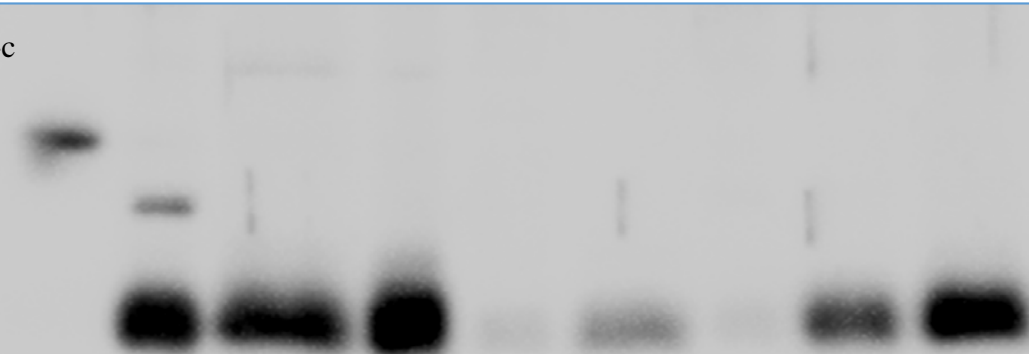



**Figure 1C**

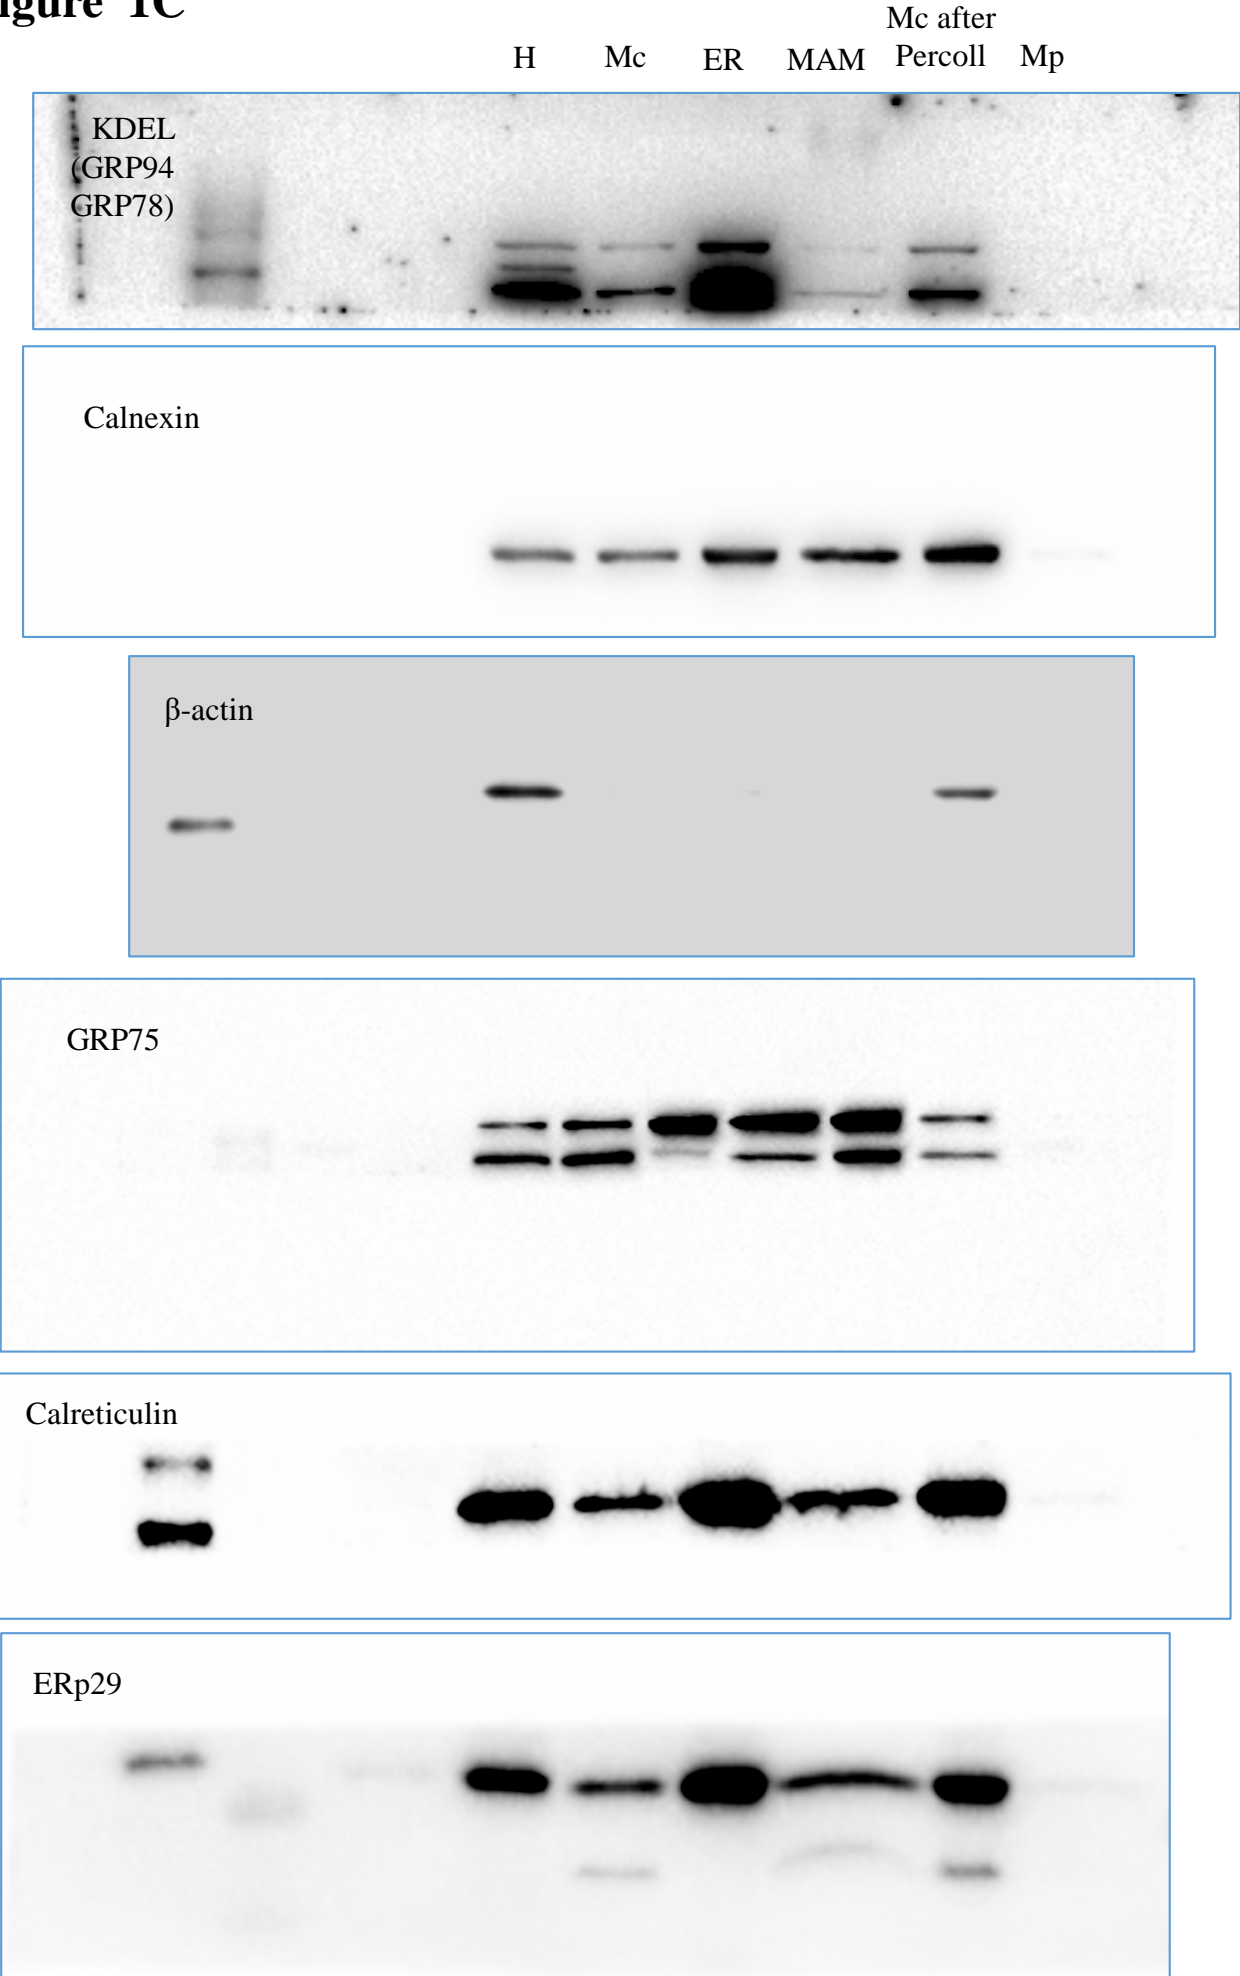

Supplement: 41598_2017_2213_MOESM1_ESM.pdf [file 41598_2017_2213_MOESM1_ESM.pdf]
